# Supplementary material
Source: PubMed Central journal article supplement (PMC5607374)

# SI Figure 3

## SURF\_18

### Top-Hit Species Distribution

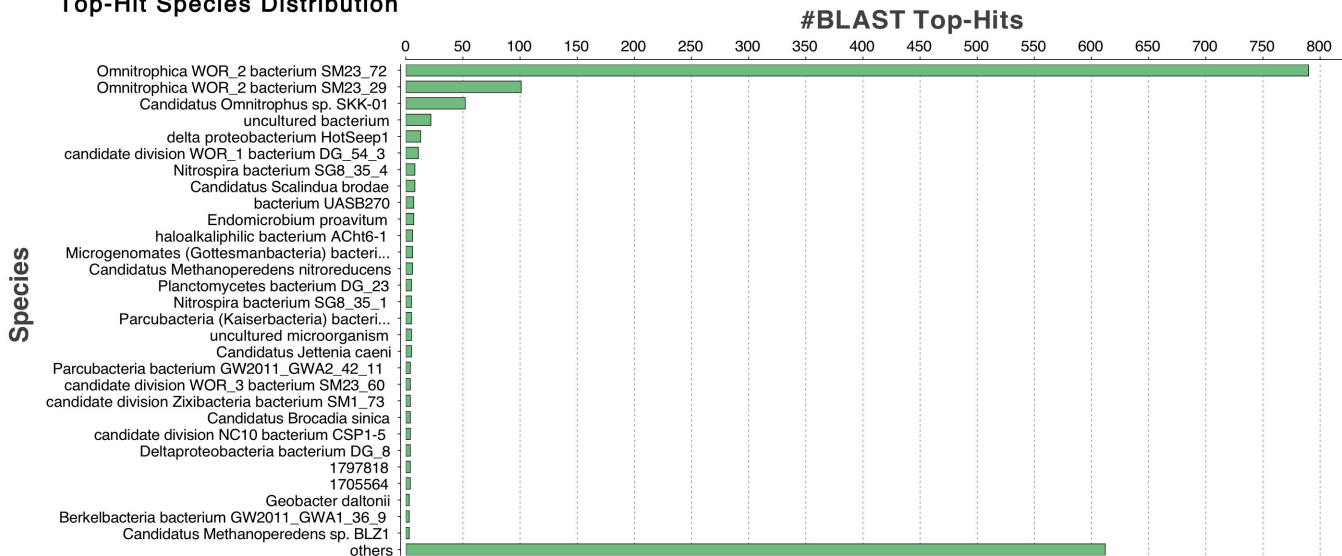

### Sequence Similarity Distribution

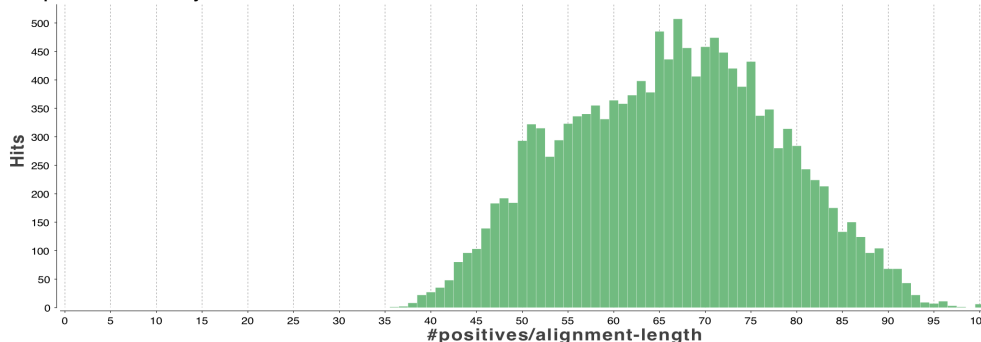

## SURF\_25

### Top-Hit Species Distribution

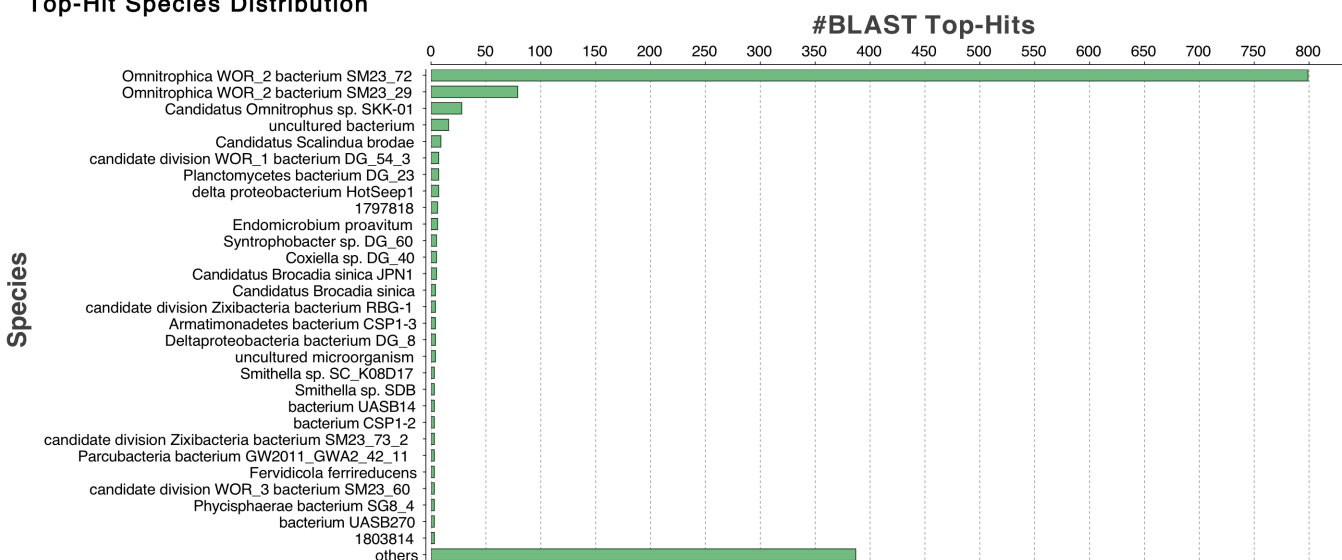

### Sequence Similarity Distribution

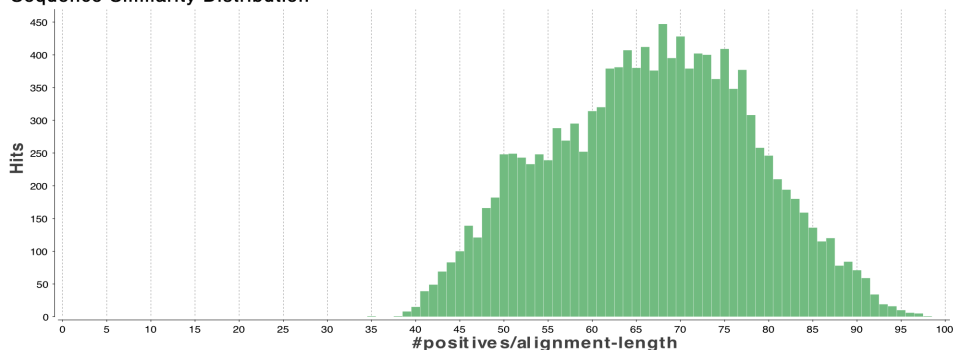

Supplement: ismej201794x3.pdf [file ismej201794x3.pdf]
