# Supplementary material
Source: PubMed Central journal article supplement (PMC5607374)

# SI Figure 5

## SURF 5

Top-Hit Species Distribution

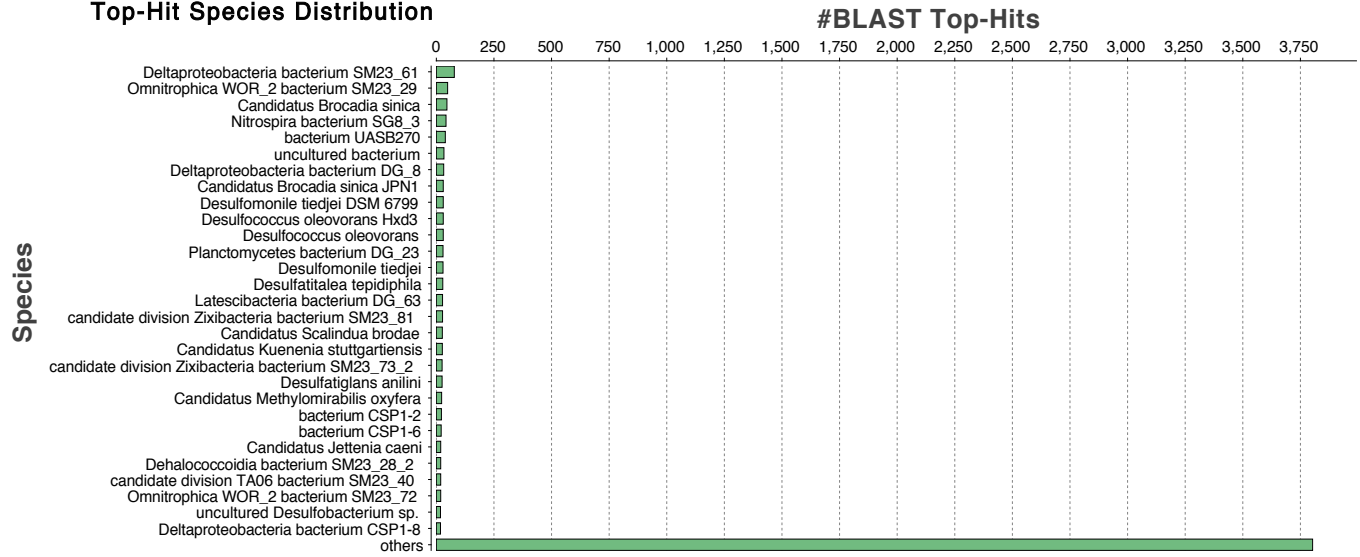

Sequence Similarity Distribution

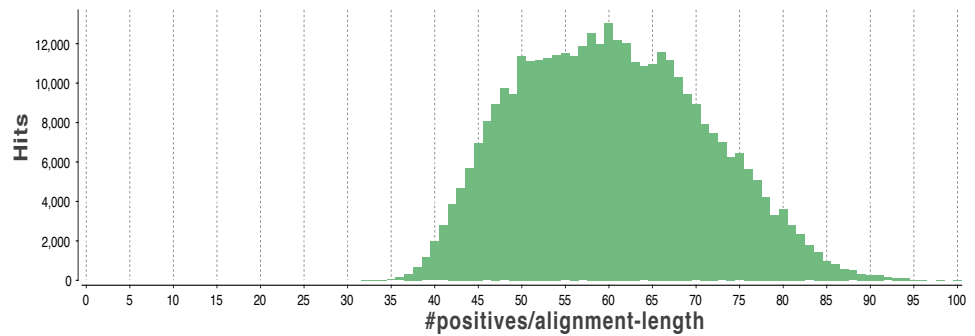

## SURF 17

Top-Hit Species Distribution

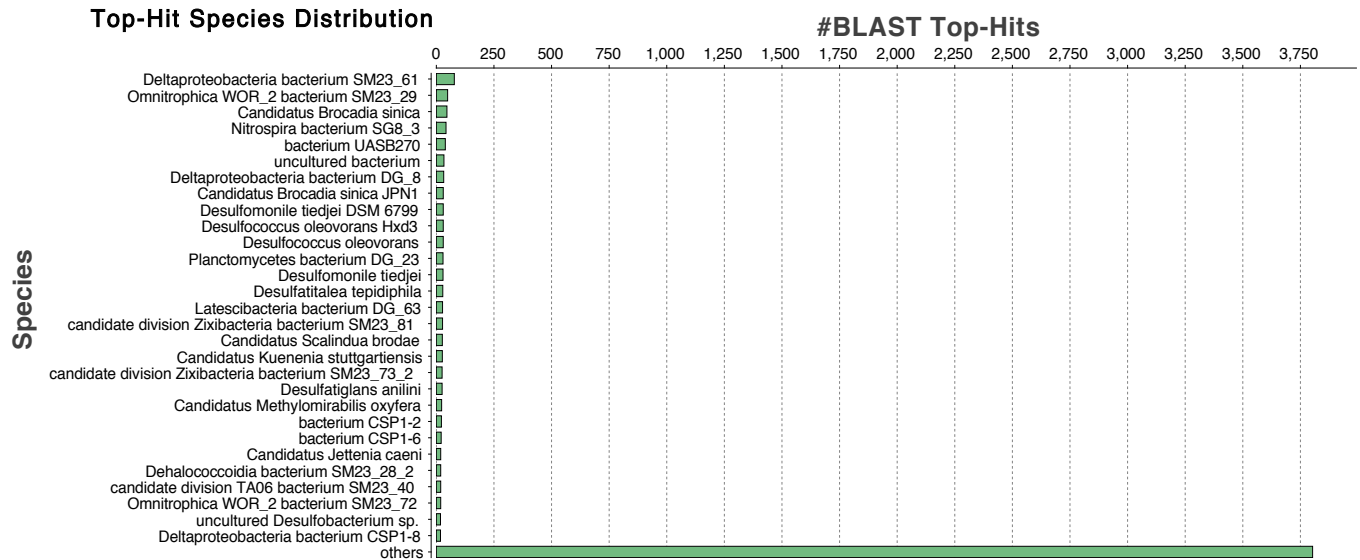

Sequence Similarity Distribution

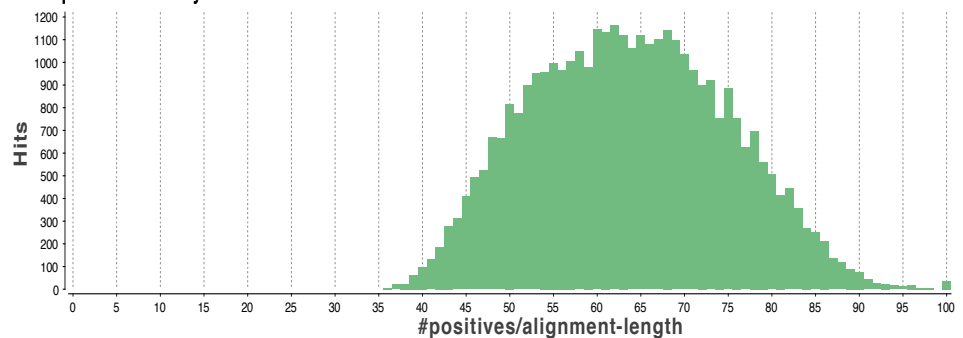

Supplement: ismej201794x5.pdf [file ismej201794x5.pdf]
