# Supplementary material
Source: PubMed Central journal article supplement (PMC5607374)
Supplement: ismej201794x6.pdf [file ismej201794x6.pdf]

Supplementary Table 1. Complete list of names and reactions mediated used for identification of metabolic marker genes. Genes listed in red were not found in genomes or metagenom

|                                | Process/Gene type                                     | Gene        |
|--------------------------------|-------------------------------------------------------|-------------|
| <b>Iron/Manganese</b>          | Iron/manganese reduction                              | mtrA        |
|                                |                                                       | mtrC        |
|                                | Iron/manganese oxidation                              | cyc1        |
|                                |                                                       | cyc2        |
|                                |                                                       | cyt 572     |
|                                |                                                       | cymA        |
|                                |                                                       | mtoA        |
| mtoB                           |                                                       |             |
| foxE                           |                                                       |             |
| foxY                           |                                                       |             |
| foxZ                           |                                                       |             |
| <b>Sulfur</b>                  | Sulfide oxidation                                     | fcc         |
|                                |                                                       | sqr         |
|                                | Sulfite reduction                                     | dsrD        |
|                                | dsrA                                                  |             |
|                                | Sulfur oxidation                                      | dsrB        |
|                                | dsrL                                                  |             |
|                                | Sulfur oxidation                                      | dsrE        |
|                                | dsrF                                                  |             |
|                                | dsrH                                                  |             |
|                                | sor                                                   |             |
| Thiosulfate oxidation          | soxB                                                  |             |
| soxY                           |                                                       |             |
| soxC                           |                                                       |             |
| Sulfate reduction              | asrA                                                  |             |
| asrB                           |                                                       |             |
| asrC                           |                                                       |             |
| Thiosulfate disproportionation | phsA                                                  |             |
| <b>Hydrogen</b>                | FeFe hydrogenase                                      | Group B1/B3 |
|                                |                                                       | Group A     |
|                                | Ni-Fe Hydrogenase                                     | Group 1     |
|                                |                                                       | Group 2a    |
|                                |                                                       | Group 2b    |
|                                |                                                       | Group 3a    |
|                                |                                                       | Group 3b    |
|                                |                                                       | Group 3c    |
|                                |                                                       | Group 3d    |
|                                |                                                       | Group 4     |
| <b>Methane</b>                 | Methane oxidation - Particulate methane monooxygenase | pmoA        |
|                                |                                                       | pmoB        |
|                                |                                                       | pmoC        |
| <b>Nitrogen</b>                | Nitrite oxidation                                     | nxrA        |
|                                |                                                       | nxrB        |
|                                | Nitrate reduction                                     | napA        |
|                                |                                                       | napB        |
|                                |                                                       | narA        |
|                                |                                                       | narB        |
|                                |                                                       | narD        |
|                                | narG                                                  |             |
|                                | Nitrite reduction                                     | nrfA        |
|                                |                                                       | nrfD        |
| nirB                           |                                                       |             |
| nirD                           |                                                       |             |
| nirG                           |                                                       |             |

|                              |                                                     |                                                                                                                                        |
|------------------------------|-----------------------------------------------------|----------------------------------------------------------------------------------------------------------------------------------------|
|                              | Nitric oxide reduction                              | norB<br>norC                                                                                                                           |
|                              | Nitrous oxide reduction                             | nosD<br>nosZ<br>nosF<br>nosY                                                                                                           |
| <b>Oxygen</b>                | Oxygen metabolism - cytochrome c oxidase, caa3-type | CoxA<br>CoxB                                                                                                                           |
| <b>C1 compounds</b>          | Formate oxidation                                   | formate dehydrogenase, alpha subunit<br>formate dehydrogenase, beta subunit<br>formate dehydrogenase, gamma subunit<br><br>fhcD<br>fae |
| <b>Carbon monoxide</b>       | CO oxidation                                        | coxS<br>coxM<br>coxL                                                                                                                   |
| <b>Halogenated compounds</b> | Halogenated compounds breakdown                     | redH                                                                                                                                   |
|                              | Perchlorate reduction                               | pcrA<br>pcrB                                                                                                                           |
