# Supplementary material
Source: PubMed Central journal article supplement (PMC5607374)

SI Figure 1

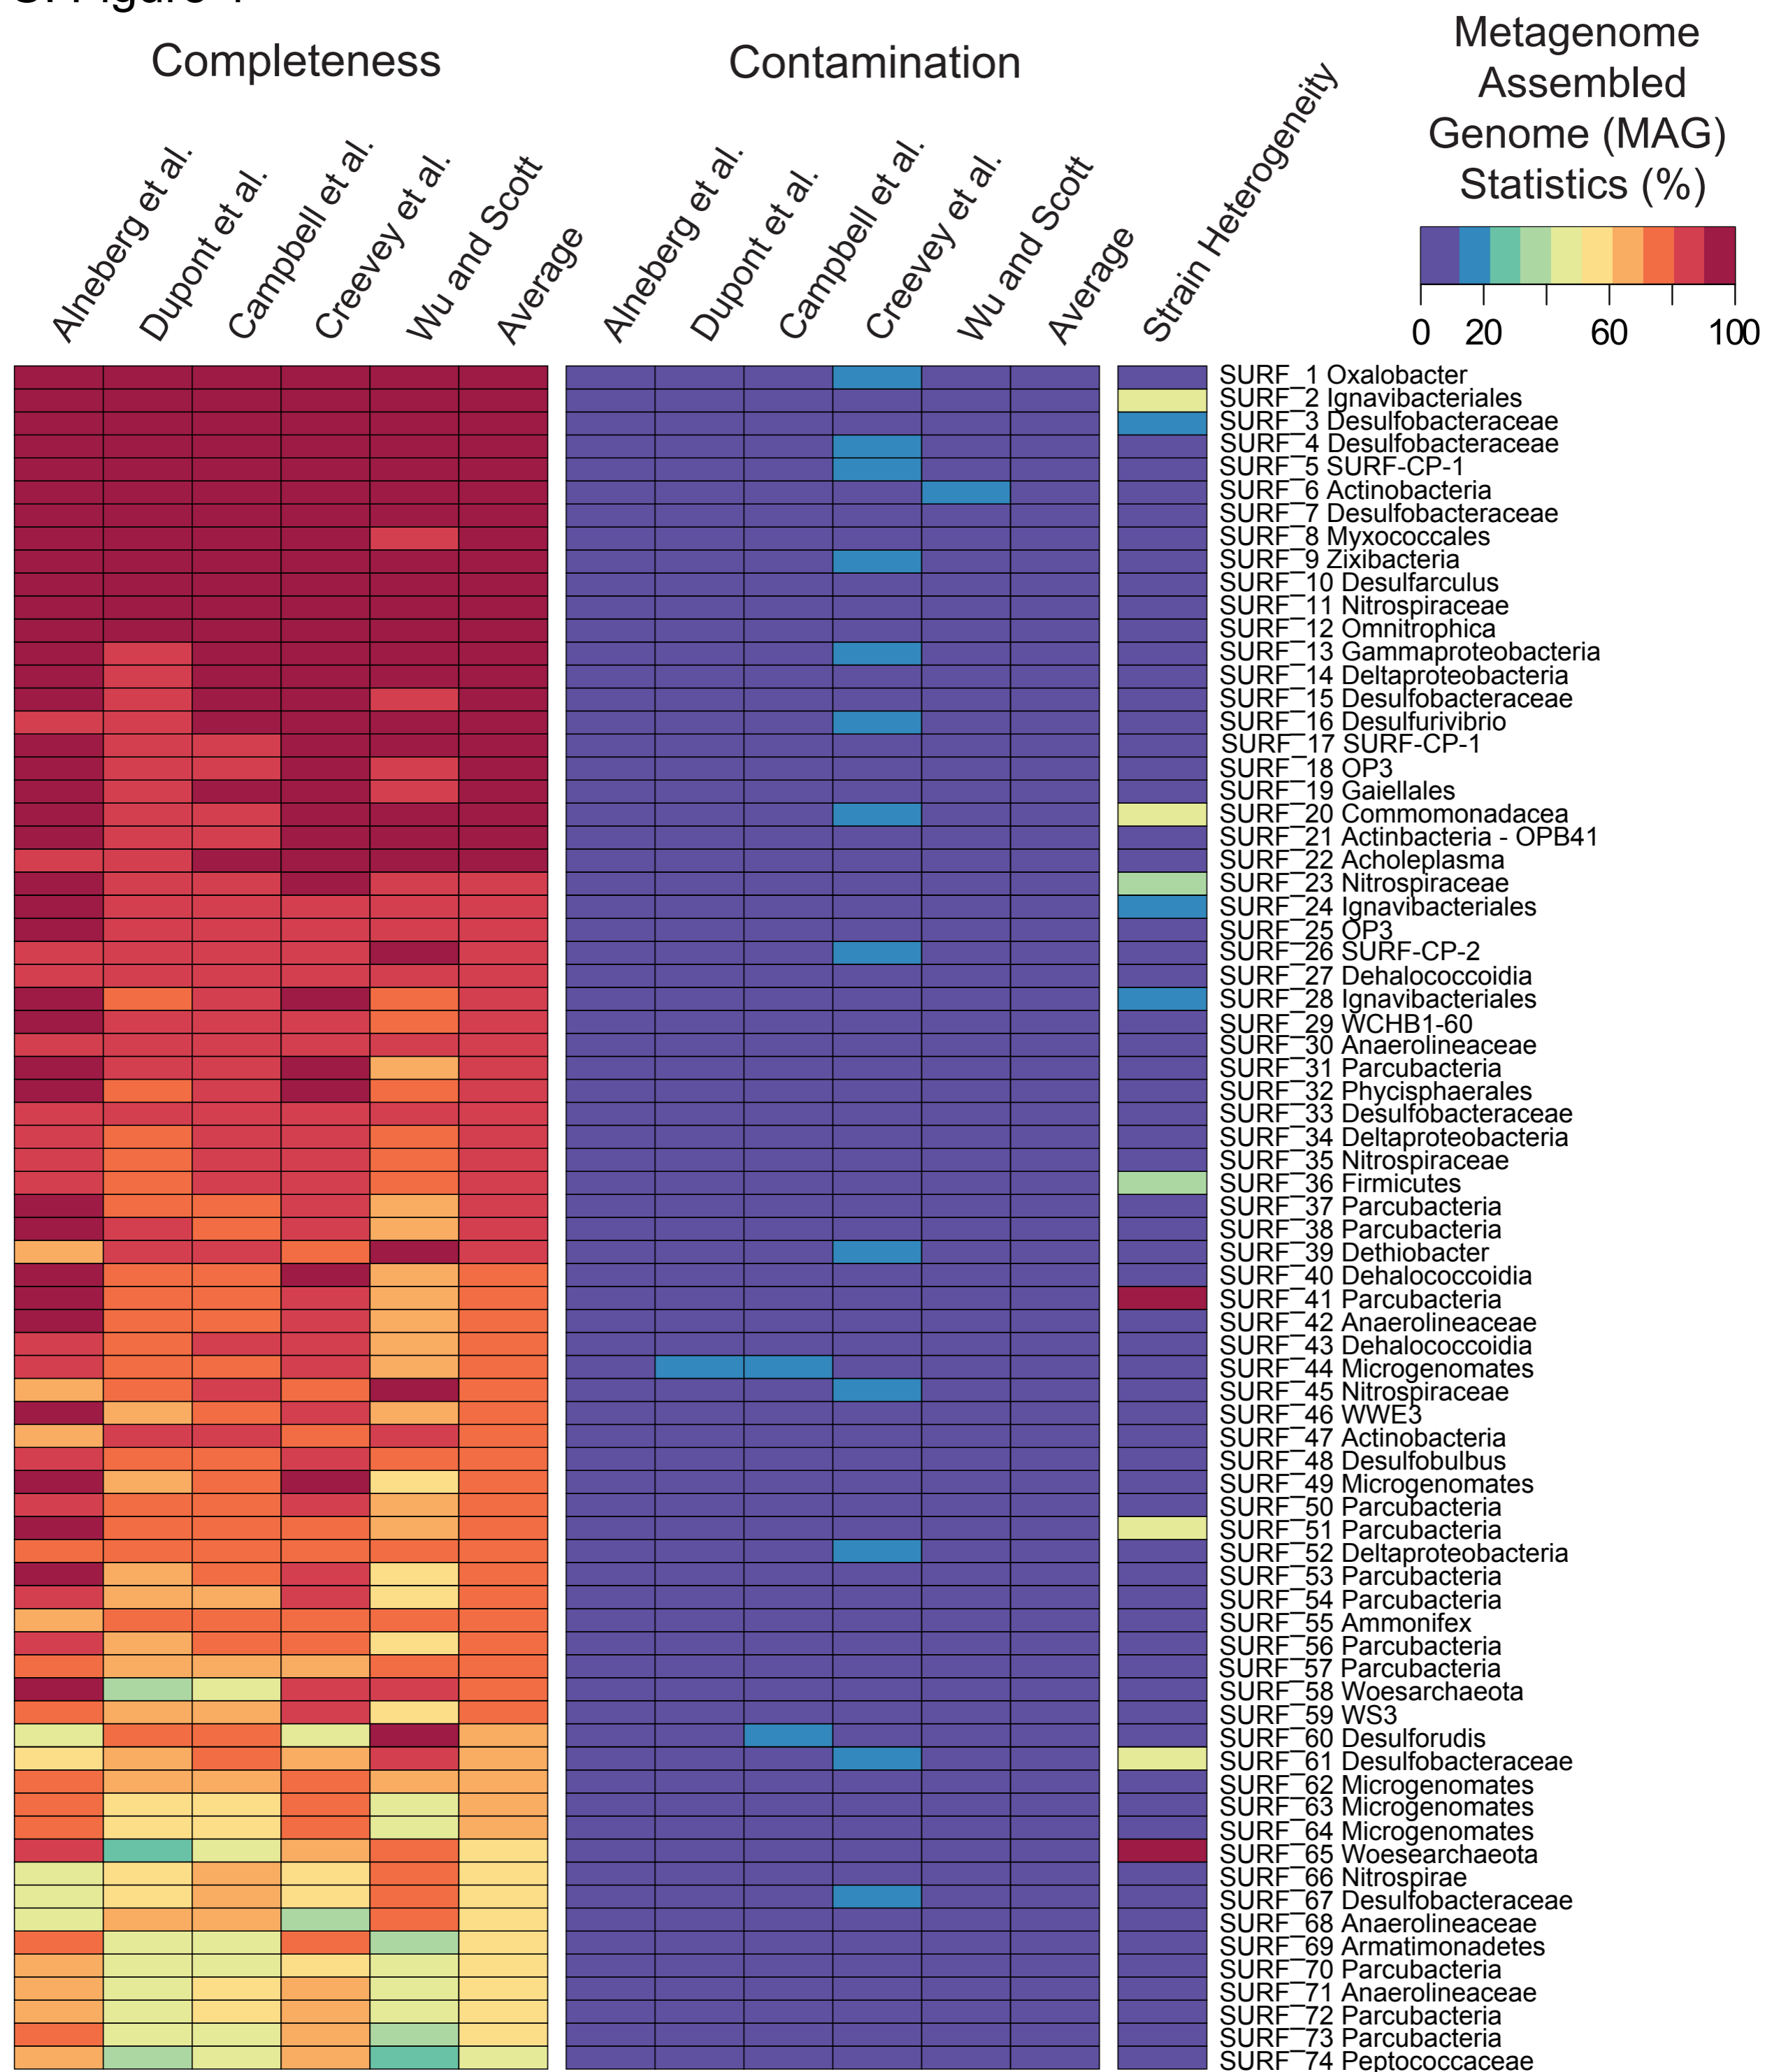

Supplement: ismej201794x1.pdf [file ismej201794x1.pdf]

Figure S2

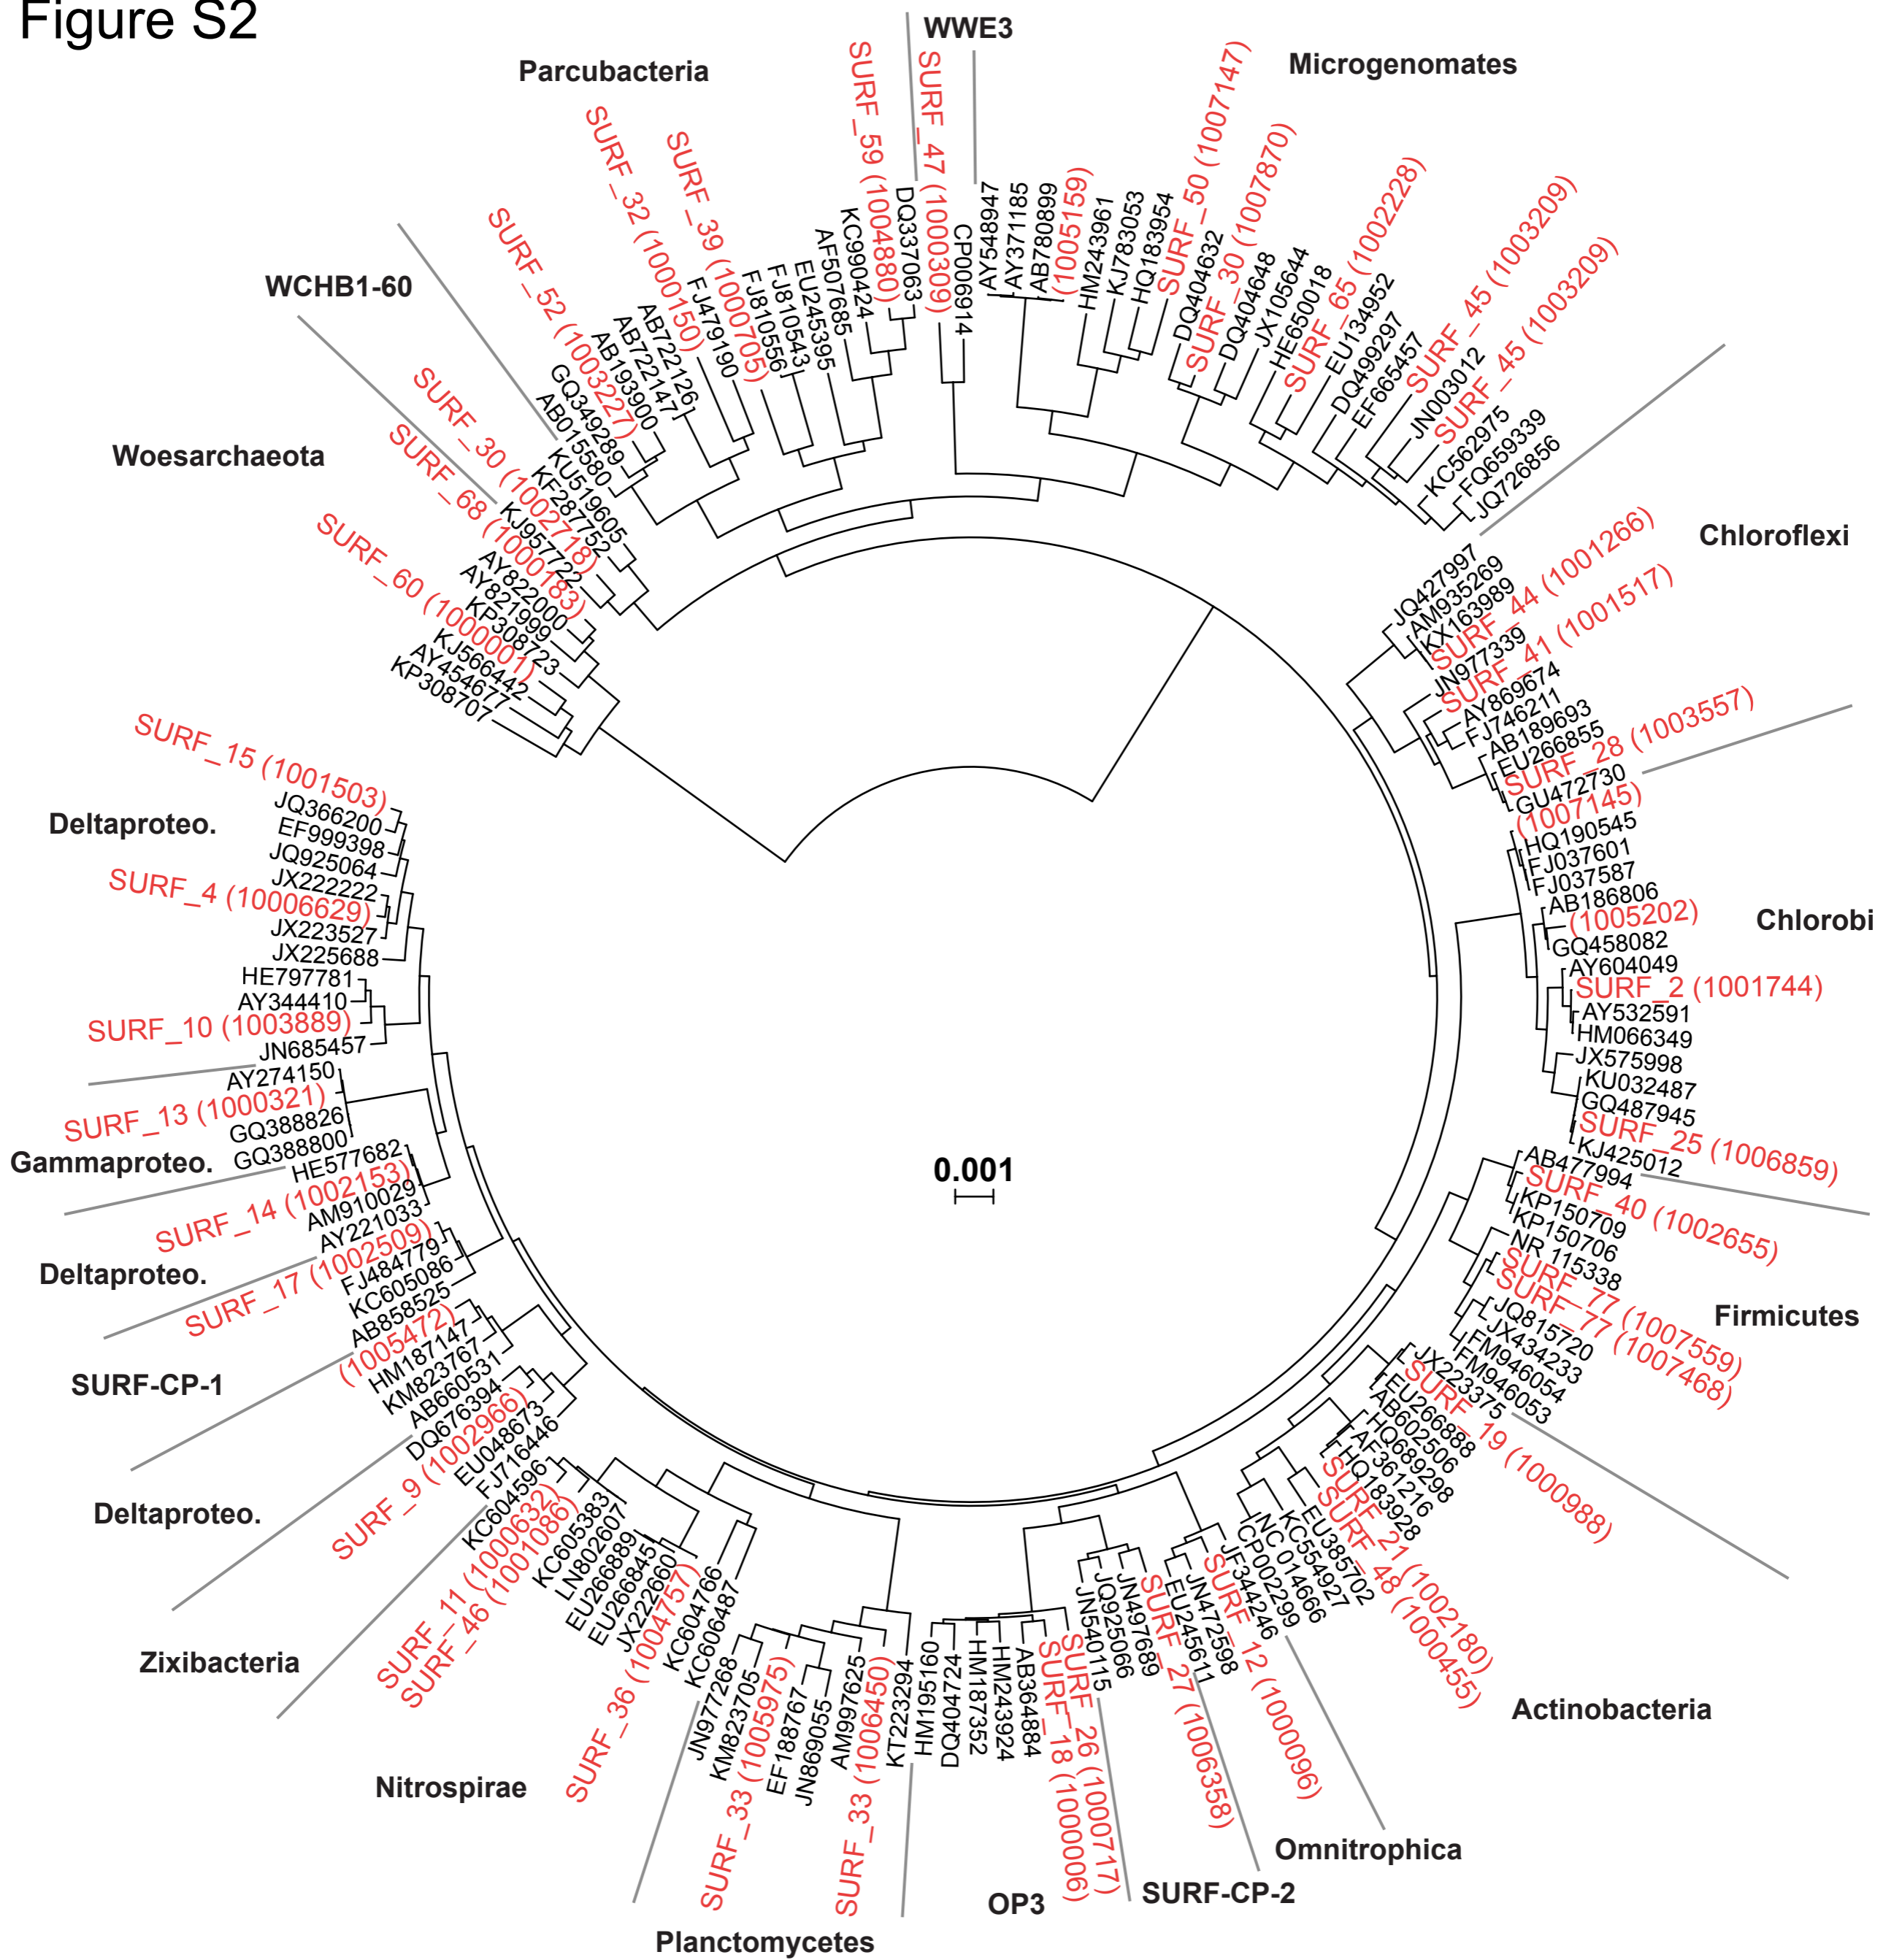

Supplement: ismej201794x2.pdf [file ismej201794x2.pdf]

# SI Figure 4

## SURF\_26

### Top-Hit Species Distribution

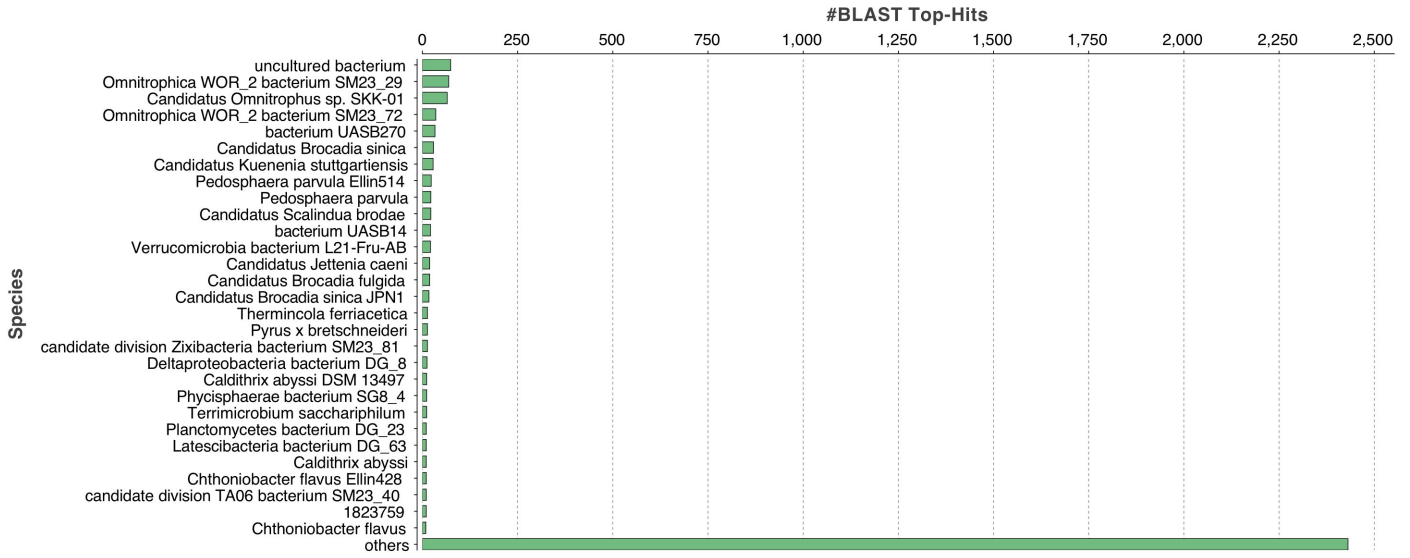

### Sequence Similarity Distribution

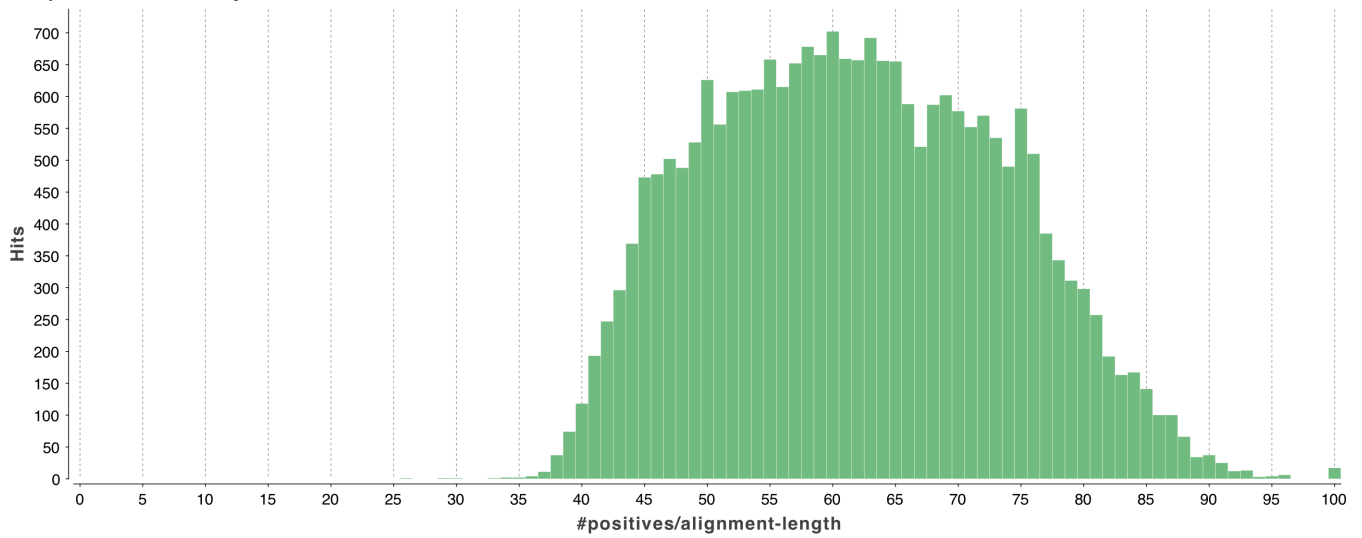

Supplement: ismej201794x4.pdf [file ismej201794x4.pdf]
